# Supplementary material for: Prognosis of stage III colorectal carcinomas with FOLFOX adjuvant chemotherapy can be predicted by molecular subtype
Source: PubMed Central journal article supplement (PMC5503619; doi:10.18632/oncotarget.17023), 2017-04-11
Supplement: oncotarget-08-39367-s001.pdf [file oncotarget-08-39367-s001.pdf]

# Prognosis of stage III colorectal carcinomas with FOLFOX adjuvant chemotherapy can be predicted by molecular subtype

## SUPPLEMENTARY FIGURES AND TABLES

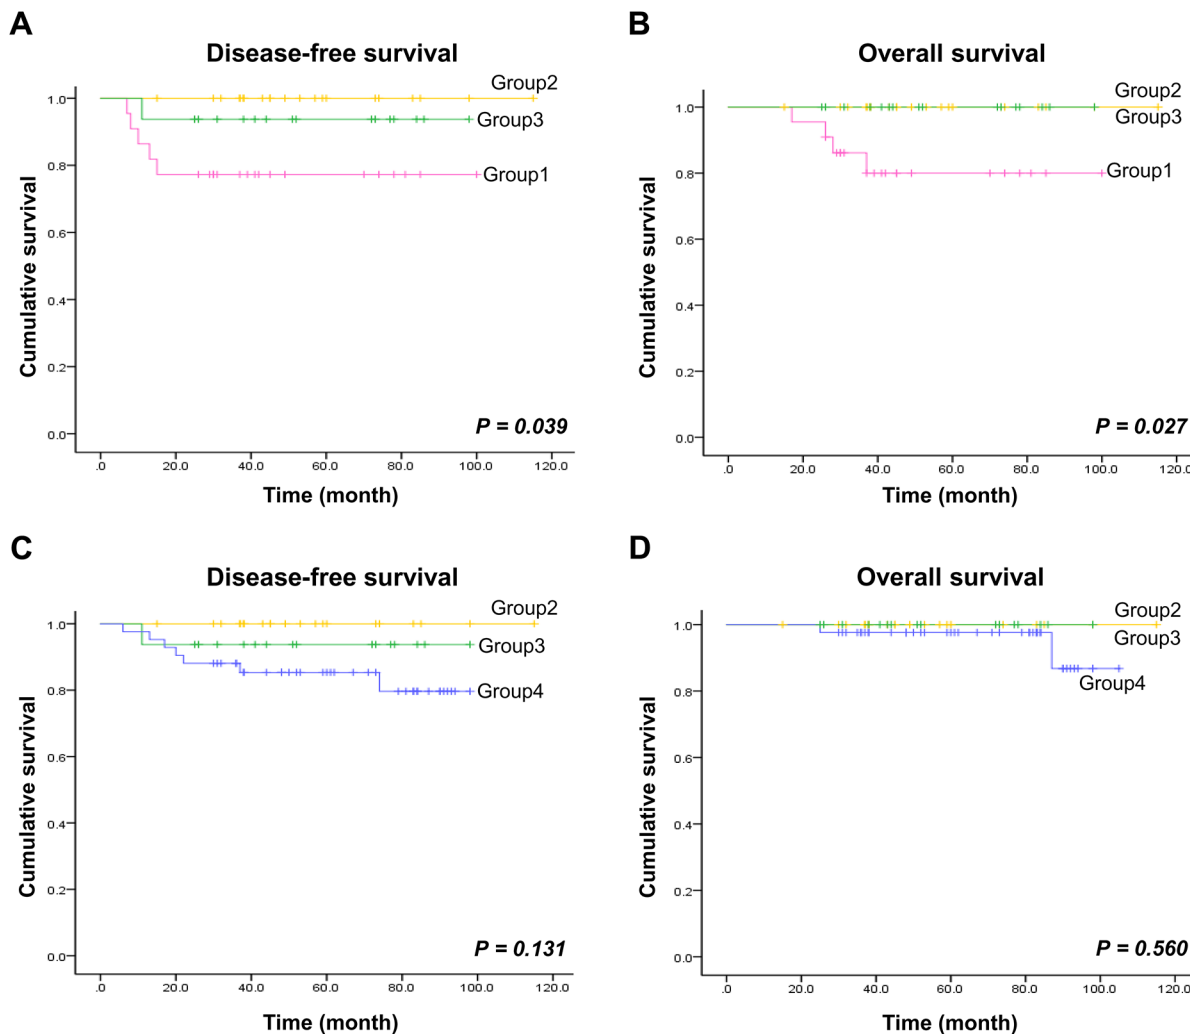

**Supplementary Figure 1: Kaplan-Meier survival analysis in CRC molecular subtypes. (A and B)** Disease-free survival and overall survival of groups 1, 2, and 3. **(C and D)** Disease-free survival and overall survival of groups 2, 3, and 4.

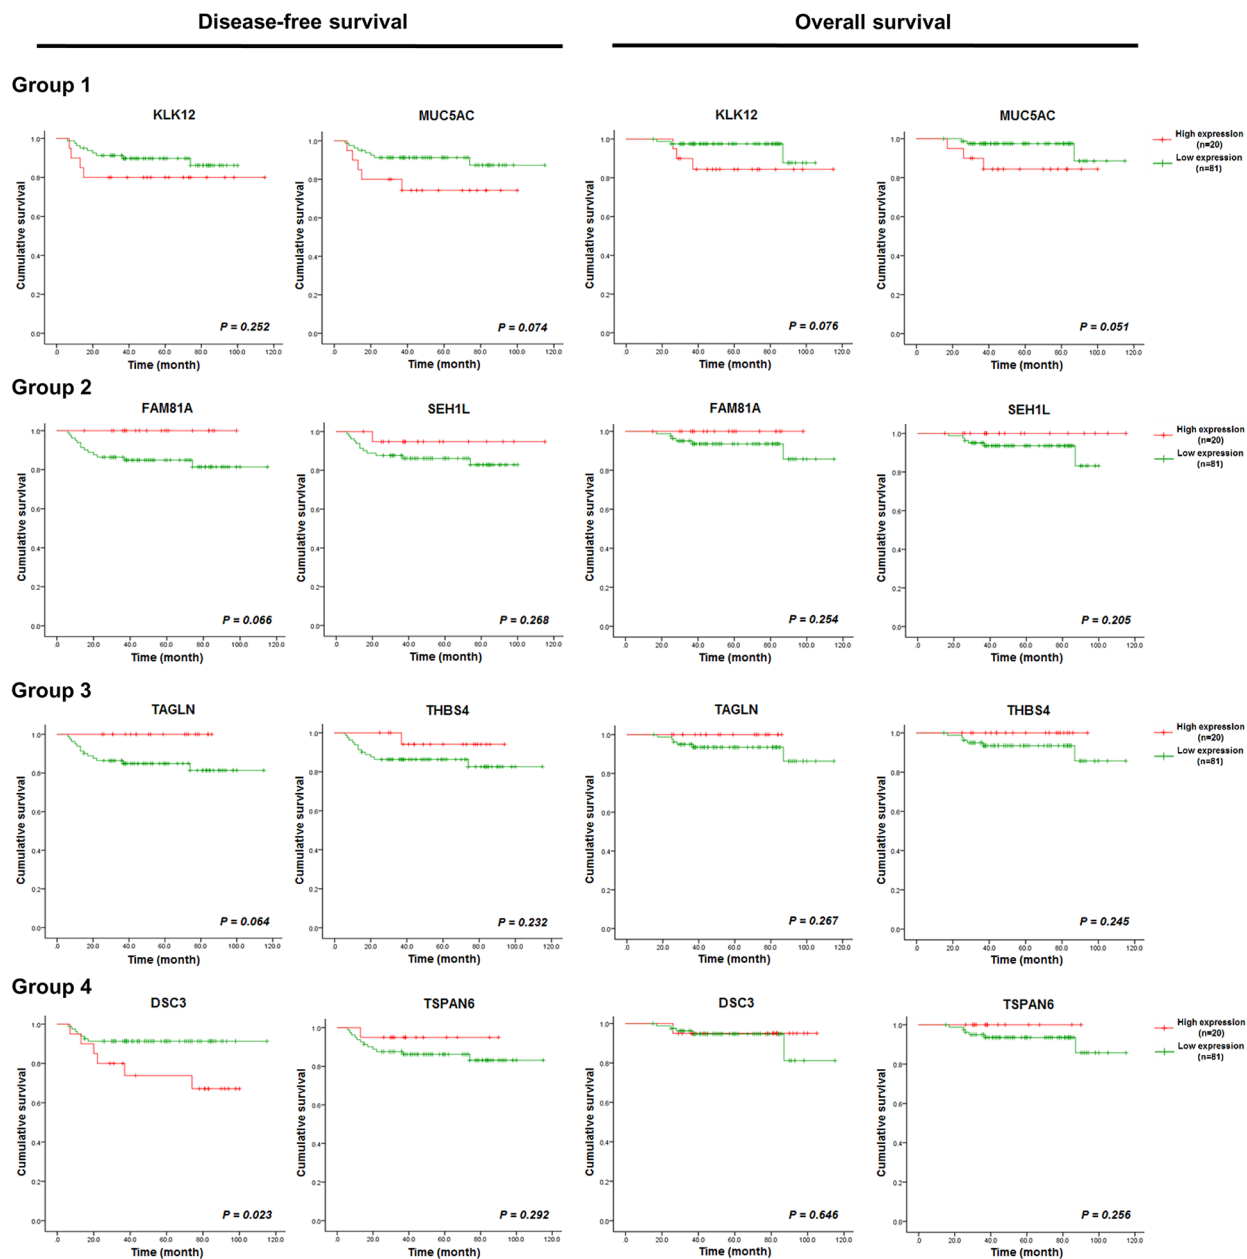

**Supplementary Figure 2: Survival curves of patients with stage III CRCs according to the expression of genes representing each CRC subtype.** Disease-free survival and overall survival according to the gene expression (n=8). Group 1: *KLK12* and *MUC5AC*; Group 2: *FAM81A* and *SEH1L*; Group 3: *TAGLN* and *THBS4*; Group 4: *DSC3* and *TSPAN6*.

**Supplementary Table 1: Concordance rate between subtypes divided by CMS classification and subgroups divided by the gene co-expression network analysis**

|                            |              | Weighted gene co-expression network class |            |           |         | Total |
|----------------------------|--------------|-------------------------------------------|------------|-----------|---------|-------|
|                            |              | Group A                                   | Group B    | Group C   | Group D |       |
| <b>Predicted CMS class</b> | CMS1         | 4 (13.4%)                                 | 2 (9.1%)   | 0 (0%)    | 4 (20%) | 10    |
|                            | CMS2         | 13 (43.3%)                                | 14 (63.6%) | 5 (62.5%) | 6 (30%) | 38    |
|                            | CMS3         | 3 (10%)                                   | 4 (18.2%)  | 2 (25%)   | 4 (20%) | 13    |
|                            | CMS4         | 10 (33.3%)                                | 2 (9.1%)   | 1 (12.5%) | 6 (30%) | 19    |
|                            | undetermined | 8                                         | 4          | 2         | 7       | 21    |
|                            | Total        | 38                                        | 26         | 10        | 27      | 101   |

Supplementary Table 2: Clinicopathologic features of 101 CRCs according to the CMS molecular subtypes

| Category                     | Variables                | CMS1         |        | CMS2          |        | CMS3          |        | CMS4          |        | Non consensus |        | P-value            |
|------------------------------|--------------------------|--------------|--------|---------------|--------|---------------|--------|---------------|--------|---------------|--------|--------------------|
|                              |                          | (n=10, 9.9%) |        | (n=38, 37.6%) |        | (n=13, 12.9%) |        | (n=19, 18.8%) |        | (n=21, 20.8%) |        |                    |
| Age, years                   |                          | 51.1±15.15   |        | 59.08±11.33   |        | 61±9.69       |        | 60.53±9.82    |        | 59.90±10.16   |        | 0.465              |
| Gender                       | male                     | 4            | 40.0%  | 22            | 57.9%  | 9             | 69.2%  | 9             | 47.4%  | 7             | 33.3%  | 0.234              |
|                              | female                   | 6            | 60.0%  | 16            | 42.1%  | 4             | 30.8%  | 10            | 52.6%  | 14            | 66.7%  |                    |
| Location                     | right side               | 7            | 70.0%  | 6             | 15.8%  | 6             | 46.2%  | 8             | 42.1%  | 9             | 42.9%  | 0.008 <sup>a</sup> |
|                              | left side                | 3            | 30.0%  | 32            | 84.2%  | 7             | 53.8%  | 11            | 57.9%  | 12            | 57.1%  |                    |
| Preop CEA level              | ≤5ng/ml                  | 10           | 100.0% | 26            | 68.4%  | 11            | 84.6%  | 15            | 78.9%  | 11            | 52.4%  | 0.046 <sup>a</sup> |
|                              | >5ng/ml                  | 0            | 0.0%   | 12            | 31.6%  | 2             | 15.4%  | 4             | 21.1%  | 10            | 47.6%  |                    |
| Gross type                   | exophytic                | 10           | 100.0% | 27            | 71.1%  | 11            | 84.6%  | 14            | 73.7%  | 15            | 71.4%  | 0.037              |
|                              | non exophytic            | 0            | 0.0%   | 11            | 28.9%  | 2             | 15.4%  | 5             | 26.3%  | 6             | 28.6%  |                    |
| Size                         |                          | 6.36±2.42    |        | 4.88±1.66     |        | 4.93±2.40     |        | 4.62±1.32     |        | 5.44±2.26     |        | 0.328              |
| Histologic Diagnosis         | adeno carcinoma          | 8            | 80.0%  | 38            | 100.0% | 12            | 92.3%  | 18            | 94.7%  | 19            | 90.5%  | 0.014 <sup>a</sup> |
|                              | mucinous adeno carcinoma | 0            | 0.0%   | 0             | 0.0%   | 1             | 7.7%   | 1             | 5.3%   | 2             | 9.5%   |                    |
|                              | medullary carcinoma      | 2            | 20.0%  | 0             | 0.0%   | 0             | 0.0%   | 0             | 0.0%   | 0             | 0.0%   |                    |
| Mucin formation              | absent                   | 4            | 40.0%  | 34            | 89.5%  | 6             | 46.2%  | 17            | 89.5%  | 11            | 52.4%  | <.001 <sup>a</sup> |
|                              | focal                    | 6            | 60.0%  | 4             | 10.5%  | 6             | 46.2%  | 1             | 5.3%   | 8             | 38.1%  |                    |
|                              | predominant              | 0            | 0.0%   | 0             | 0.0%   | 1             | 7.7%   | 1             | 5.3%   | 2             | 9.5%   |                    |
| Crohn like lymphoid reaction | low-density group        | 4            | 40.0%  | 31            | 81.6%  | 7             | 53.8%  | 11            | 57.9%  | 15            | 71.4%  | 0.058              |
|                              | high-density group       | 6            | 60.0%  | 7             | 18.4%  | 6             | 46.2%  | 8             | 42.1%  | 6             | 28.6%  |                    |
| Invasion pattern             | expanding                | 5            | 50.0%  | 5             | 13.2%  | 0             | 0.0%   | 2             | 10.5%  | 3             | 14.3%  | 0.03 <sup>a</sup>  |
|                              | intiltrative             | 5            | 50.0%  | 33            | 86.8%  | 13            | 100.0% | 17            | 89.5%  | 18            | 85.7%  |                    |
| BRAF <sup>b</sup>            | Wild type                | 9            | 90.0%  | 38            | 100.0% | 13            | 100.0% | 19            | 100.0% | 21            | 100.0% | 0.099              |
|                              | Mutation                 | 1            | 10.0%  | 0             | 0.0%   | 0             | 0.0%   | 0             | 0.0%   | 0             | 0.0%   |                    |
| KRAS <sup>b</sup>            | Wild type                | 8            | 80.0%  | 27            | 71.1%  | 5             | 38.5%  | 13            | 68.4%  | 8             | 38.1%  | 0.031 <sup>a</sup> |
|                              | Mutation                 | 2            | 20.0%  | 1             | 28.9%  | 8             | 61.5%  | 6             | 31.6%  | 13            | 61.9%  |                    |
| MSI status                   | MSS/ MSI-low             | 4            | 40.0%  | 38            | 100.0% | 12            | 92.3%  | 19            | 100.0% | 20            | 95.2%  | 0 <sup>a</sup>     |
|                              | MSI high                 | 6            | 60.0%  | 0             | 0.0%   | 1             | 7.7%   | 0             | 0.0%   | 1             | 4.8%   |                    |
|                              | MLH1 loss <sup>c</sup>   | 6            |        | 0             |        | 0             |        | 0             |        | 0             |        |                    |
|                              | MSH2 loss <sup>c</sup>   | 1            |        | 0             |        | 1             |        | 0             |        | 0             |        |                    |
|                              | PMS2 loss <sup>c</sup>   | 5            |        | 0             |        | 0             |        | 0             |        | 1             |        |                    |
|                              | MSH6 loss <sup>c</sup>   | 1            |        | 0             |        | 1             |        | 0             |        | 0             |        |                    |

<sup>a</sup>P<0.05, <sup>b</sup>Pyrosequencing, <sup>c</sup>Immunohistochemical stain, MSS: Microsatellite stability, MSI: Microsatellite instability
